# Supplementary material for: Caenorhabditis elegansglutamylating enzymes function redundantly in male mating
Source: Oxford University Press journal article supplement (doi:10.1242/bio.017442), 2016-09-15
Supplement: bio017442supp.pdf [file bio017442supp.pdf]

**Supplementary Table 1. *C. elegans* strains used in this study**

| Strain Name | Genotype                                                                                              | Reference                                                    |
|-------------|-------------------------------------------------------------------------------------------------------|--------------------------------------------------------------|
| CB444       | <i>unc-52(e444) II</i>                                                                                | (Liu and Sternberg, 1995)                                    |
| CB1487      | <i>him-9(e1487) II</i>                                                                                | (Hodgkin et al., 1979)                                       |
| MT3641      | <i>osm-10(n1602)</i>                                                                                  | (Hart et al., 1999)                                          |
| NIN15       | <i>him-9(e1487) II; tll-11(tm4059) IV</i>                                                             | This study                                                   |
| NIN16       | <i>him-9(e1487) II; tll-4(tm3310) III; tll-11(tm4059) IV;<br/>tll-5(tm3360) V</i>                     | This study                                                   |
| NIN20       | <i>him-9(e1487) II; tll-4(tm3310) III</i>                                                             | This study                                                   |
| NIN21       | <i>him-9(e1487) II; tll-5(tm3360) V</i>                                                               | This study                                                   |
| NIN23       | <i>him-9(e1487) II; tll-9(tm3889) V</i>                                                               | This study                                                   |
| NIN24       | <i>him-9(e1487); tll-15(tm3871)</i>                                                                   | This study                                                   |
| NIN40       | <i>nIs133 [pkd-2p::GFP] I; him-9(e1487) II</i>                                                        | This study; (Schwartz and Horvitz, 2007)                     |
| NIN45       | <i>nIs133 [pkd-2p::GFP] I; him-9(e1487) II; tll-4(tm3310) III; tll-11(tm4059) IV; tll-5(tm3360) V</i> | This study; (Schwartz and Horvitz, 2007)                     |
| OC343       | <i>tll-5(tm3360) V</i>                                                                                | This study                                                   |
| OC422       | <i>tll-4(tm3310) III</i>                                                                              | This study, (Kimura et al., 2010) and (O'Hagan et al., 2011) |
| OC423       | <i>tll-11(tm4059) IV</i>                                                                              | This study                                                   |
| OC419       | <i>tll-9(tm3889) V</i>                                                                                | This study, (Kimura et al., 2010) and (O'Hagan et al., 2011) |
| OC504       | <i>tll-15(tm3871) V</i>                                                                               | This study                                                   |
| PS3151      | <i>lov-1(sy552) II; him-5(e1490) V</i>                                                                | (Barr and Sternberg, 1999)                                   |

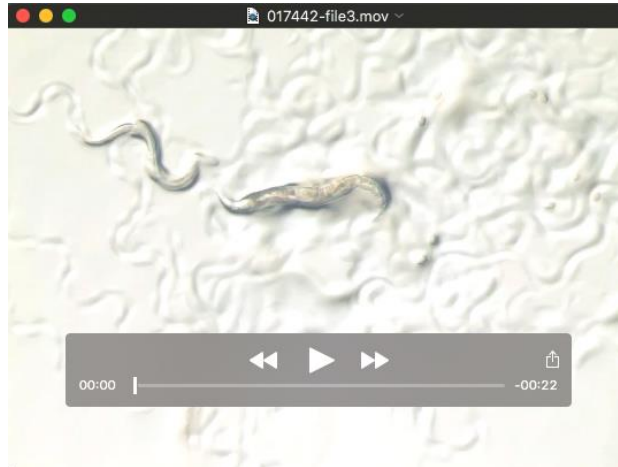

**Movie 1: Wild type male mating behavior.**

A *him-9* male executes the response step of male mating. Upon contact with an hermaphrodite, by aligning his tail with her body and initiating a backward motion.

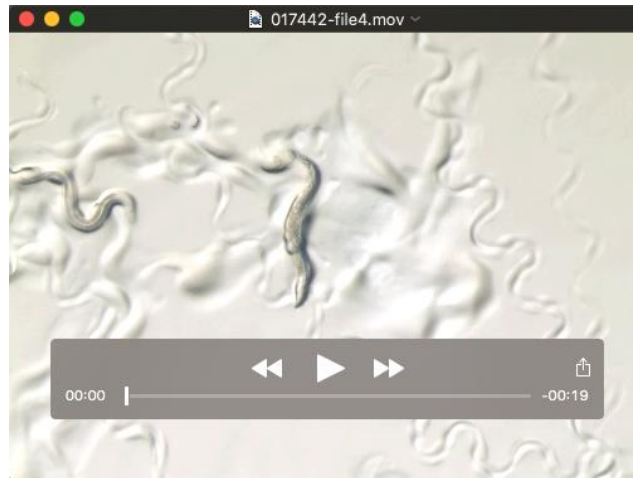

**Movie 2: Triple mutants show a defect in the response step of male mating behavior.**  
A triple mutant male fails to execute the response step of male mating upon contact with an hermaphrodite.

## Supplementary Data 1. TLL Protein sequence Alignments and Annotations.

TLL-4

CLUSTAL 2.1 multiple sequence alignment

|         |                                                                                                   |     |
|---------|---------------------------------------------------------------------------------------------------|-----|
| mmTLL4  | MASAGTEHYSIGLRRGNSFKQRHPSGTVSASPSEKPEVKVWSQAHQOVKPIWKLEKKHV                                       | 60  |
| ceTLL-4 | -----                                                                                             |     |
|         |                                                                                                   |     |
| mmTLL4  | GTLNAGLGLVSLGVSQPAYFLCPSTLCSGTTAVIAGHSNPCYLQSLPNLFSNTLLYRR                                        | 120 |
| ceTLL-4 | -----                                                                                             |     |
|         |                                                                                                   |     |
| mmTLL4  | TNVRQKPYQOLESFCLRSSPSEKRSFSLPQKGLPVSVTANKATSSSTVFPMAQPMATSPTD                                     | 180 |
| ceTLL-4 | -----                                                                                             |     |
|         |                                                                                                   |     |
| mmTLL4  | PYLSLAAAGENPSRKSLASAIISKIASPLSYKPMNNSFMRPNSTKVPQSQATDGLKPV                                        | 240 |
| ceTLL-4 | -----                                                                                             |     |
|         |                                                                                                   |     |
| mmTLL4  | SSPKIQPVSWHHSGGTGDCVPQPGDHKVPQNIATVLDDVTAPITPSIPSTLNISTASVTS                                      | 300 |
| ceTLL-4 | -----MSSGYSSAPSVSH                                                                                | 13  |
|         | * : * : . * * :                                                                                   |     |
|         |                                                                                                   |     |
| mmTLL4  | SQCSQSNFRMEAHPCGLDENPDSQSATKEVHFTEAVRKLAEKGLEKMPROGYQFEQACFV                                      | 360 |
| ceTLL-4 | TSSDIDLNRIDSYDDGAEETDEQ-----                                                                      | 37  |
|         | : . . . . * : : : : * : * . . . . *                                                               |     |
|         |                                                                                                   |     |
| mmTLL4  | NPSFQWGLLNRSRRWKPLMGQRFQEDIGLDSAILPGTSDTLGLDSTVFCTKRISIHLLA                                       | 420 |
| ceTLL-4 | -----                                                                                             |     |
|         |                                                                                                   |     |
| mmTLL4  | SHVHGLNPSACGSAVDLPQVLGEDRAPVPPSSLQPLGVAEVATRLSSVHLDQPGKEPEEA                                      | 480 |
| ceTLL-4 | -----RMCG-----LS-----ELVTSCLTSSRLK-----                                                           | 56  |
|         | ** * . * : : * : * * * :                                                                          |     |
|         |                                                                                                   |     |
| mmTLL4  | KDLNSCTKGGGSATDLQPNQVEPEDTEDELGDGLEDSCSHDENEEEGDSECSSLSVVSP                                       | 540 |
| ceTLL-4 | -----AIDEEDEEE---NCNDIEIVGL                                                                       | 75  |
|         | : * : : * * * : * : . . . : * :                                                                   |     |
|         |                                                                                                   |     |
| mmTLL4  | SESVALISRN---CVDLMSKSLPNHEKVVRPALIYSLFPNVPTPTIYFGTRDERVEKLPW                                      | 596 |
| ceTLL-4 | SKTTTTKVKRSKKVLSCPIVSSSTKENGNAAPFLKSSQFTDVPPTIRFYTKGTKVKTPAR                                      | 135 |
|         | * : : : : : * . . . : * : * : . . * * * * . : * : * * * * * : * : * * .                           |     |
|         |                                                                                                   |     |
| mmTLL4  | EQRLLRWKMSTVTPNIVKQTIIGRSHFKISKRNDDWLGCVGHHMKSPPGFRSIREH                                          | 656 |
| ceTLL-4 | QIARL TWCHNSLLPIVMRQTLAASHFTVVDLSLFYVGYWGRHLKSAQYRALOPH                                           | 195 |
|         | : : * * . : : * : : * : : * : . . . . : * * * * * : : : * : * * * :                               |     |
|         |                                                                                                   |     |
| mmTLL4  | <b>FPGSFQIGRKDR</b> LRNLSRMQSRFGKKEFSFFPQSFILPODSKLLRKAWESSSRQ <b>KWIVK</b>                       | 716 |
| ceTLL-4 | <b>FPGAFHIGRKDR</b> LMHIRKQOERFEG-EFDIMPFTYILPTDRQELLKYLETDASR <b>HVIVK</b>                       | 254 |
|         | * * : * : * * * * * * : : * * * * * * * * * * * * : * * * * * * * * * :                           |     |
|         |                                                                                                   |     |
| mmTLL4  | <b>PPASARGIGIQ</b> VIHKWSQLPKRRPLLV <b>OR</b> YHLHKPYLISGSKF <b>DLRIYVYVTSYDPLRIYL</b>            | 776 |
| ceTLL-4 | <b>PPASARGTGISV</b> TRKPKDFPTTATLVA <b>QH</b> YIERPLTINRAK <b>DLRLYAYVPTFEPLRVYI</b>              | 314 |
|         | * * * * * * * * * * * * * * * * : * . : * : . . * : * * * * : * : * * * * * * * * * * * * * * * : |     |
|         |                                                                                                   |     |
| mmTLL4  | <b>FSDGLVRFASCKYSPSMKSLSNKFMHLTNYSVNKKNTEYQANADETACQGH</b> -KWALKALW                              | 835 |

|          |                                                                                           |      |
|----------|-------------------------------------------------------------------------------------------|------|
| ceTTL-4  | <b>YDQGLVRFASVPYSHSVSTISNKYMHLTNYSINK</b> ----- <b>LAEADGVANKPVPKWTLHHLW</b>              | 369  |
|          | :.:***** ** *.:.:****:*****:** *:* .* : **:* **                                           |      |
| mmTTL4   | <b>NYLSQKGINSDAIWEKIKDVVVKTIISSEPYVTNLLKLYVRRPYSCHELF</b> <b>GFD</b> <b>IMLDENL</b>       | 895  |
| ceTTL-4  | <b>EHFDEMVDREKIQREIEEVIIKAFISTEKP IREHMSRFLEQEFICYELF</b> <b>GIDI</b> <b>IILDEDY</b>      | 429  |
|          | :.:. : * : : * .:****:****:* : : . : . : : * :****:****:****:                             |      |
| mmTTL4   | <b>KPWVLEVNISPSL</b> HNSPLDISIKQMIRDLLNLAGFVLPN <b>MEDI</b> ISSSSPSSSSGSST                | 955  |
| ceTTL-4  | <b>KPWVLEVNISPSL</b> HSGTPLDVSVKAPLAKDVLNLAGVYVP----- <b>PSFDKLSDA</b>                    | 478  |
|          | ***:*****.:****:*. : :*:*****. :* ** .. *.:                                               |      |
| mmTTL4   | <b>SLPSSPRDKCQMTPEHF</b> <b>TAQMKKAYYL</b> <b>TQKIPDQDFYASVLDVLT</b> <b>PDDVRLVEMEDEF</b> | 1015 |
| ceTTL-4  | <b>DYSTRPRNGRKNREQLIKEASWVAAYKDQLGVIDN</b> ---- <b>RIFKRLTPEDTRALVEFEDEL</b>              | 534  |
|          | . .: **: : : :. . ** : * : :. : **:*.*.***:***:                                           |      |
| mmTTL4   | <b>SRRGQFERIFPSRIS</b> SRYLRFQPRYFNILTTQWEQKYHGKGLKGVDLLRNWCYKGFHT                        | 1075 |
| ceTTL-4_ | <b>ERIGDFKLVFPTAHTSHYQKYFAETIYMNILLQWQIAQEDDRSIGINRLEQLCRQKHMQ</b>                        | 594  |
|          | . * **:* :***: **:* :* :. *:* ** : . : : * : * : * : .                                    |      |
| mmTTL4   | GIVSDSAPLWSLPTSLMTTSTKGDGTPNSASKSRKKSASEGTTLSSEDRSTPKSKKSQAGL                             | 1135 |
| ceTTL-4_ | ---SDQE-----TSF-----                                                                      | 601  |
|          | ** . **:                                                                                  |      |
| mmTTL4   | SPISRKTLSSRSNENTSKQSKRSTPGLPVLKYSQSSRLSAASASQSVTDSRLTAVSS                                 | 1193 |
| ceTTL-4_ | -----                                                                                     |      |

Key:

- DOMAIN NOT INCLUDED
- Predicted Substrate Interacting Domains
- ATP & Mg<sup>2+</sup> Interacting Domains
- Essential ATP-Binding Residues
- Cationic MT Binding Domain
- Extended TTL-Domain
- Core TTL-Domain
- Deletion

TTL-5  
 CLUSTAL 2.1 multiple sequence alignment

```

mmTTL5 -----MPVVMARDL 9
ceTTL5-5 MKPKNVPREIFNPFTNKTSLGTRREGLFLCKRLKLRPDNYLEEYCADLEVIDIMAPIRPA 60
          :. *

mmTTL5 EETASSEDEDLANQEDHPCIMWTGG-CRRIPVLVFHAEAILTKDNNIRV-----IGER 62
ceTTL5-5 DETERCPPTSTSDDEAGDYLVSRNKKSRNSDYMLFSSDALVHIAHDAKVSEKYTWLGER 120
          : ** .. . : ** : : . *. : * : : : : : : * : **
          :

mmTTL5 YHLSYKIVRTDSRLVRSILTAHGFEVHPSSTDYNLMWTGSHLKPFLRLTLSEAQKVNHF 122
ceTTL5-5 LRLTFKMMRSDSRLIRTMCHSHCFMQCSSKNPSVNVIVWCAPVKSVMRELMPWQRLNOF 180
          : * : : : : : : * : : : : : * : * : * : * : * : * : *
          :

mmTTL5 PRSYELTRKDRLYKNIIRMQHTHGKFAHILPQTFLLLPAEYAEFCNSYSKDR----- 174
ceTTL5-5 PRSTELTKKDRLYENIERSKSIK-ESFDIFIPEFYVTPRENRMENAFVVRVAKEIAAAGG 239
          * * * : * : * : * : * : * : * : * : * : * : * : * : *
          :

mmTTL5 -----GPWIVKPVASSRGRGVYLINPNQISLEENILVSRVINNPLLIDDFKFDVRLYLVL 229
ceTTL5-5 ELCFPGEFIVKPTNSRQCKGIFFANSMADIPAECPILLVSRYLKDPYLVNNHKFDLRIYVA 299
          * : * * * . * : * : : : : * . : * . * : * * * : * : * : * : * : *
          :

mmTTL5 VTSYDPLVIYLYEGLARFATVRYDOGSKNIR-NQFMHLTNYSVNKKSVDYVSCDDPEVE 288
ceTTL5-5 VTSFYPLVAVVYSEGLARLASRPYDTSASSADSNEYVHLTNYSINKNSTSFVRNESMSSE 359
          * * : * * * : * . * * : * : * * * : * : * : * : * : *
          :

mmTTL5 DYGNKWSMSAMRLRYLKQEGKDTTALMAHVEDLIKTIISAELAIATACTFVPHRSSCFE 348
ceTTL5-5 DLCHKWTLGALLRYVENECKDAKLMLRIEDLIVKSLLSIQNSVATASRTNLRFACTNFE 419
          * * : * : : : * : * : : * * : * : * : * : * : * : * : *
          :

mmTTL5 LYGFDVLIIDNTLKPWLLLEVNLSPSLACDAPLDLKIKASMISDMFTVVGFVCQDPAQRTSN 408
ceTTL5-5 LFCFDVLDQALKPWLLLEVNLSPSLACDAPLDSLLKTRLIADLLNLA---CVPLLDRKII 476
          * : * * * : * : * * * * * * * * * * * * * * * * * * * * * * *
          :

mmTTL5 RSIYPSFESSRRNPFQKQRTPLSASDAEMKNLVAAREKVPGLGGSVLGLSMEEIK- 467
ceTTL5-5 DSVTPALRKSMSNSQESSESETDDELDPMCAKTLKRRPVGLKRSVLNKKIVSGSTSLIPN 536
          * : * : * . * .. : * * * * . * . * * . * . * : * . *
          :

mmTTL5 -----VLRVKEENDRRGGFIRIFPTSETWEIYGSYLEHKTSMNYMLATRLFQDRGNP 520
ceTTL5-5 NEKKFDQIVRKAELEDGRRGDFIRVFPNCTWCMYSPVMEDLCNED----- 582
          : * : : : * : * * . * * : * . : * . : :
          :

mmTTL5 RRSLLTGRARVSTEGAPELKVESMNSKAKLHAALYERKLLSLEVRKRRRRSGLRAMRPK 580
ceTTL5-5 -----FDERLFDEVVTKKNTKNSSGSSKASS 608
          : : : * : . * * : . . : . .
          :

mmTTL5 YPVIAQPAEMNIKTETESEEEEVGLDNDDEEQEASQEEASAGSLGENQAKYTPSLTVIVE 640
ceTTL5-5 SSASASSSSSMHIEDLSDLFHEVMMQCDKYSS-----IA 643
          .. * . . . . : : * * : . * : : * . .
          :

mmTTL5 NSPRDNAMKVAEWTNKGEPCKKIEAQEPESKFNLMQILQDNGNLSKVQARLAFSAYLQHV 700
ceTTL5-5 DVPIEIREIISPWYEEASEYTKKITQECETYACKLPVIRSTARLR---TKSCAEFYEV 699
          : * : : : * : : . * : * * : : : : * * : : : :
          :

mmTTL5 QIRLTKDSSGQTLSPSWAAKEDQOMELVVRFLKRASSNLOHSLRMVLPSTRRLALLERRRI 760
ceTTL5-5 KVQLAK---KKESEAMASKENEPVILQAVVAKRI----- 730
    
```

:::\*\*\* :. \* : \*::\*\* : \* . . \*\*

|                    |                                                               |      |
|--------------------|---------------------------------------------------------------|------|
| mmTTL5<br>ceTTL5-5 | LAHQLGDFIGVYNKETEQMAEKSKKKLEEEEDGVNAESFQEFIRQASEAELEEVLTIFY   | 820  |
| mmTTL5<br>ceTTL5-5 | TQKNKSASVFLGTHSKSSKNSSSYSDSGAKGDHPETIQEVKIKQPKQQQATEIHADKLSR  | 880  |
| mmTTL5<br>ceTTL5-5 | FTTSSGKEAKLVYTNCSFCSPAVLLQRLPSSHLSSVITTSALSAGPGHSHASLSQIPPA   | 940  |
| mmTTL5<br>ceTTL5-5 | VPSPHQPALLLSPVPDNAPPSIHSGTQNVSPAGLPRCRSGSYTIGPFSSFQSAHIYSQ    | 1000 |
| mmTTL5<br>ceTTL5-5 | KLSRPSSAKAAGSCHPHKHHSGIAKTQKEGEDVSLNRRYNQSLVTAELQRLAEKQAAARQY | 1060 |
| mmTTL5<br>ceTTL5-5 | SPASHISLLTQQVTNLNLASSVINRSSASTPPTLRPVISPSGPTWSIQPDLHASETHSSP  | 1120 |
| mmTTL5<br>ceTTL5-5 | PGSRSLQTTGGFAWEGEVENNAYSKTTGVVPOHKYHPTAGSYQLHFALQOLEQOKLQSRQL | 1180 |
| mmTTL5<br>ceTTL5-5 | LDQSRARHQAIFGSQTLPNSSLWTMNGPGCRISSATTGGQKPNLTPQKVVAPPNSSTLV   | 1240 |
| mmTTL5<br>ceTTL5-5 | SKPASNHKQVLRKQPASQRASKGSSAEGQLNGLQSSLNPAAFMPITNSTGSLEAPQVIFAR | 1300 |
| mmTTL5<br>ceTTL5-5 | SKPLPTQSGALATVIGQRKSKSVKSGTI                                  | 1328 |

Key:

Predicted Substrate Interacting Domains

ATP & Mg<sup>2+</sup> Interacting Domains

Essential ATP-Binding Residues

Extended TTL-Domain

**Core TTL-Domain**

Cationic MT Binding Domain

~~Predicted Frameshift~~

TTL-9  
CLUSTAL 2.1 multiple sequence alignment

```

mmTTL9          ---MSRQKNQNSKGGHGVSKGKEREQRTLIRFKTTLLMNTLMDVLRHRPGWVEVKDEGEWDF 57
ceTTL9          MSSISNELSVTSSQNVISNSKE-QRKKKILFKCALTNTISDVLTNREGWAQTQGD-DWQF 58
                :*.: . *. : :*:.* :.:. * ** :* **: *** :* **.:.: :*:
mmTTL9          YWCDVSWLRENFHDHYMDEHVRISHFRNHYELTRKNYMKNLKRFRKYLERESGKTEAAK 117
ceTTL9          FWVTREWMTTCYDKHKFSEKQMICFRNDFELTRKDFLIKNYKKARKAKEK-SGIDVVSE 117
                :*  .*:  :*:  :*:  *.*.*.:*.*.:.:** *: ** *: **  .:
mmTTL9          CDFFPKTFEMPCEYHLFVEEFRKNP-GITWIMKPVARSOGKGIFLFRRLKDIMDWRKGTS 176
ceTTL9          FNFLPSSYVLPTEYHLFVEEFRKYPNDTIWIMKPVAGAOCKGIFLFRKLKHVQENKK--- 174
                :*.*.: :* *.*.*.*.*.* * . *.*.*. :*.*.*.*.*.*.:*.: :*:
mmTTL9          GKKPTGVETQPARANMNPSGSHDRSSDDQKDDLPVENYVAQRYVENPYLIGRKFDLRV 236
ceTTL9          -KDSSGSEALP-----YVVQCYVHNPYLVGKKFDVRI 206
                *..:* *: * **.*.*.*.*.*.*.*.*.*.*.*.*.*.*.*.*.*.*.*
mmTTL9          YVLVMSYIPLRAWLYRDGFARFSNTRFTLNSIDDHYVHLTNVAVQKTSPDYHLKKGCKWM 296
ceTTL9          YVLVTSFRPLNAWVHREGFARFSHSRVSTDSVDDAFVHLTNVAVAKTAADYDPERGLKWS 266
                **** *: **.*.:*:*.*.*.*.:*.: :*.* :*.*.*.*.*.*.*.*.*.:* **
mmTTL9          LQRFROYLASKHGPKAVETLFSDMNIFIKLSQSVQKVIISDKHCFELYGYDILIDQDLK 356
ceTTL9          LPKLFRFFKSVHGOSKLSKTMNDLTNVIESLKSVQNLIIQDNHCFELYCYDILFDENLK 326
                * :. :. :* ** . . . . :*.: *:*:*:*:*:*:*:*:*:*:*:*:*:*:*:*
mmTTL9          PWLLEVNASPSLTASSQEDYELKTCLEDTLHVVDMEARLTGKEKRVGGFDLMWNDGPVS 416
ceTTL9          PWLLEVNASPSLTASSQEDFELKYRILNHMIDVLDIEKKLIGNENEVGGFDLLIKN---S 383
                *.*.*.*.*.*.*.*.*.*:*.* :*.: .*::*:* :* *:*.*.*.*.*.: : : *
mmTTL9          REDGPSDLSGMGNFVTNTHLGCVNDRKEQLRQLFRSLQAQRKAPS 461
ceTTL9          K---PVELCKV-DFHTQPFFG-----TQFNLRLGDYVEATPMP- 417
                : * :*. : :* *.*.:* * *.*. : . *
```

Key:  
 Predicted Substrate Interacting Domains  
 ATP & Mg<sup>2+</sup> Interacting Domains  
 Essential ATP-Binding Residues  
 Extended TTL-Domain  
 Core TTL-Domain  
 Predicted Frameshift



TLL-11  
 CLUSTAL 2.1 multiple sequence alignment

```

mmTLL11      MRRSSPEKKPEAEWEADAAAAAATAAATESLPAETEKQQGV DAGAAGDPERLELEE QPK 60
ceTLL-11    --MGCKISTEFCS DNPVGSISTSKVHPTDLSTPSYAIKPV E FYEEPLKDDQLFYKVALAK 58
      ..  ..  ..  .:  .:  :::  .  :  *  *  :  *  .  .  *  :  :  .  *

mmTLL11      DVGRIPTPTRRHAP EEGEARVVRRLPPALPLAQPRP--AAR ALSQLVKARGRSRSRVYRRS 119
ceTLL-11    KEYREKEKDKKEQLSSNR RVSLQVEPNKLP IPLTRSSSLSSIMENRPPSGISNSSFIRSR 118
      .  *      :.:  ....  ::  *  **:  .  .*  :  :  :  .  *  *.  .  *

mmTLL11      AGSMRPVTV DSSKARTSLDALKISLRQLRWKEFPFGR--RLPCDIYWHGV SFRDSDILSG 177
ceTLL-11    NTASRRFTIDTSRAKSNQYV VSLCSKKIGIIEYPDGRSDKQPCDVYWHNVVLSDMNKI VT 178
      :  *  .*:  *:  *:  :.:  .....  :::  *:*  **  :  ***:  ***.*  :  *  :  :

mmTLL11      ----QVNKFPGMTEMVRKV TLSRALRIMQNLFP EEFYPRSWILPEEFQLFVSVQVQTVK 233
ceTLL-11    SPQSRVNKFPGMTE LAKKISLTHSISSMQKLPDEYAFY PNSWFLPAHLADFHAFYRKAQ 238
      :*****:  .:  *:  *:  :.:  **:*  **  **  **:*  **  .:  *  :  :.:

mmTLL11      EGDPSWKPTFIVK PDSGCQGDGIYLIKDPDGRLTGTLHNRPAV VQEIYRKPLLI-DK LK 292
ceTLL-11    ALG-KTEMWFI VKPDEGAOCTGIVLINS PNOIRNVDQRO---LVQEVVADPLIMNDK LK 293
      .  .  :  *****.*  **  *****:  *  :  *  ..  :  :*****:  .***:  ****

mmTLL11      FDIRLYVLLKSLDPLEIYIAKDGLSRFCTEPYQEPNPQNLH HVMHLTNYSLNIHSGKFV 352
ceTLL-11    FDFRVYGVIKSINPLSIYVAREGMARFCTEKYEKPDSSNFKNLYAHLTNYSLNKANEAYV 353
      **:  *:  *  :*:  :*:  **  *:  *:  :*:  :*:  *****  *:*  :  .:  :*:  :*:  *****  .  :  *

mmTLL11      HS---DSASTGSKRTFSSILCRLSSKGV DIKKVWSDIISLVIKTVIALTP ELKVFYQSDI 409
ceTLL-11    HSNTLQDQTRGSKRLLS TVFHQLESRGVKT KRLWHDIKLILVKTTLAMLPEIMLHYEHF 413
      **  :.  :  ****  :*:  :*:  :*.  :*.  *  ::*  **  :*:  *:  :*:  :*:  **  :.  *:  .:

mmTLL11      PTGRPGPTCFQILGFDILLMKNLKPMLLEVNANPSM RIEHEYELSPGVFEN---IPSLV 465
ceTLL-11    YDS-TGPOCFQIMGFDVMIRE DGTPIILLEVNAAPSL TADHIVPHPGRTLLEGGQVRVSIV 472
      .  .*  ****:  ***:  :.:  :.  :*****  **  :  :*  .  .:  :  :  :  *:*

mmTLL11      DEEVKVAVIRD TRLMDPLKKKKEIHFPDIYMDRKHRI PPVSDRMSSWKHKGSSLSIVRS 525
ceTLL-11    DEVIKIPLVRDTLLLV LGLMEEYQNN-----SLKGETKSLDDM 511
      **  :*:  :*:  :***  *  :  *  :.:  :  :  :  :  :  .  **.:  :  *

mmTLL11      QQMEKSFTSKEDLNCDPTGGDSEPNPEAHLPSIC LKQVFPKYAKQFN YLRLVDRMANLFI 585
ceTLL-11    QTIKQ-----RRKPHLSEIFP-----TRYGAHSGHLLFLDKAMYIYM 548
      *  :.:  :  :  :  :  :  :  :  :  :  :  :  :  :  :  :  :  :  :  :  :  :  :  :

mmTLL11      RFLGIKGMTKLGPTGFRTFIRNCKLSSSSLSMAAVDILY IDITRRWNSVTVDQRDSGMCL 645
ceTLL-11    QFVQLRSNVNITNAGLKQFVRKCNLID-IIPVHVDAKVSE INYYFTGEKRTN-GNGLPF 606
      *:  :*:  :*:  :*:  :*:  :*:  *  :.:  .  **  :*.  :..  .  :  .*:  :  :

mmTLL11      QAFVEAFFFLAQRKFKLQ-PLHEQVASLIDLCEYHLSVLDEKRLLCHRGRPLQRN----- 699
ceTLL-11    HAFLMFLFFIAEKKFVLENDLLSKVQRLLSFCDM SLRRYGVR SARLRRAEVDSTIGNVEI 666
      **:  :  :*:  *:  *:  *  :  *  .:*  *:  *:  *  .  :  :  :*  .  .

mmTLL11      ---PPQMN RPEHSATG-----SSAPR VIGASKLSQS- 727
ceTLL-11    YMLPSRMARNRSGTNGR KQNFTDDNNPNPNSFAHLPKINERL 707
      *.:  *  *  .  .:  *  .....  .  .  *.:  :
    
```

Key:

DOMAIN NOT INCLUDED

Predicted Substrate Interacting Domains

ATP & Mg<sup>2+</sup> Interacting Domains

Essential ATP-Binding Residues

Extended TTL-Domain

**Core TTL-Domain**

Cationic MT Binding Domain

TTL-15  
CLUSTAL 2.1 multiple sequence alignment

```

mmTTL5      MPVVMARDLEETASSEDEEDLANQEDHPCIMWTGGCRRIPVLVFAEAILTKDNNIRVIG 60
ceTTL5-15  MGLLDSKLCMMILAVSVLIIDINFEARIGTFDFLRLRTSYFKKSSPLLSDSEEDLNY 60
            * :: ::      : *      * * :    :: * .   : : .*:: :

mmTTL5      ERYHLSYKIVRTDSRLVRSILTAHGFEVHPSSTDYNLMWTGSHLKPFLLRTLSEAQKVN 120
ceTTL5-15  LSKHEDKRPVAIVTGSYESAHTCHMMHIREMFEHTCYKIVTKNELSLDTKKWVMMWHHEYS 120
            * . : *   :   .* ** :* . .       : * ..* .   : :: .

mmTTL5      HFPRSYELTRKDRLYKNIIRMQHTHGFKAFHI-----LPQTFLLPAEYAEFCNSY 170
ceTTL5-15  FTQEPFKTLIKNASPNQIVNHVPCSCFYTSKVQLATSDLSNCVPKAFQLPAEKSKLLEYA 180
            . .::: * :   ::* .    ** : ::        :*: * **** :: :

mmTTL5      SKDRGPWIVKPVASSRGRGVYLINNPNOISLEEN-ILVSRVINNPILLIDDFKFDVRLYLVL 229
ceTTL5-15  EKNPDVLVWVOKDNTHRN---TKIKSTNDMDLSKNSFVOKFVDNPLLIDNKKFDIGIYTV 237
            .*: .   * :   : *.    * ..* : * : * * * : * : * * * : * : * : * :

mmTTL5      VTSYDPLVIYLYEEG-LARFATVRYDQGSKNIRNQFMHLTNYSVNKKSGDYVSCDDPEVE 288
ceTTL5-15  VTSLLPLRVYIYDGDVLIRFCPEDYHPFDANNVDKYVVGDDYTPIWEINSLKKYFNTQKM 297
            *** ** :*: * : . * * .. * . . * : : : : * :   : .. . : :

mmTTL5      DYGNKWSMSAMRLRYLKQEGKDTTALMAHVEDLIIKTIISAELAIATACTFVPHRSSCFE 348
ceTTL5-15  SFK----STIDSYLGMQMDTSKIWLQIRNIGEVFRTOOTKMLMSLONLKLN-POYFE 351
            . :      * : : * * * : * : * : : : : : : : : : : : : : : : . . * *

mmTTL5      LYGFDVLDINTLKPWLLEVNLSPSLACDAPLDLKIKASMISDMFTVVGFVCQDPAQRTSN 408
ceTTL5-15  LSRFDVVDDQLNVFLMEANMSPNLSSG---HFKQNQILYEQVLMNIFSLTGISTPITKE 408
            * ** . : * : * : * : * : * : * : * : * : * : * : * : * : * : * : * :

mmTTL5      RSIYPSFESSRRNPFQKQTRPLSASDAEMKNLVASAREKVPGKLGGSVGLGSMEEIKV 468
ceTTL5-15  ADILFKSRTSEQNPLVSRDIN--LPLKFCVENKCESCDEAPECQLCG--HCMNTETRKI 464
            . * . . : * : * * : : : . . . : * * . * : * * . . * * :

mmTTL5      LRRVKEENDRRGGFIRIFPTSETWEIYGSYLEHKTSMNYMLATRLFQDRGNPRRSLTGR 528
ceTTL5-15  LEQTFVENSNRKQMKRIQFD---YENHHPLTKEDHLLTLWLSTKCQLDNTWC----- 513
            * : . . * * . * : * *      * : . . . . . : * : * : * .

mmTTL5      ARVSTEGAPELKVESMNSKAKLHAALYERKLLSLEVRKRRRRSGRLRAMRKYPVIAQPA 588
ceTTL5-15  -----

mmTTL5      EMNIKTETESEEEEEVGLDNDDEEQEASQEESAGSLGENQAKYTPSLTVIVENSPRDNAM 648
ceTTL5-15  -----

mmTTL5      KVAEWTNKGEPCKKIEAQEPESKFNLMQILQDNGNLSKVQARLAFSAYLQHVQIRLTKDS 708
ceTTL5-15  -----

mmTTL5      GGQTLSPSWAAKEDEQMELVVRFLKRASSNLQHSLRMVLPSRRLLALLERRRILAHQLGDF 768
ceTTL5-15  -----

mmTTL5      IGVYNKETEQMAEKKSKKLEEEEDGVNAESFOEFIRQASEAELEEVLTFYTQKNKSAS 828
ceTTL5-15  -----

```

|                     |                                                                        |      |
|---------------------|------------------------------------------------------------------------|------|
| mmTTL5<br>ceTTL5-15 | VFLGTHSKSSKNSSSYSDSGAKGDHPETIQEVKIKQPKQQQATEIHADKLSRFTTSSGKE<br>-----  | 888  |
| mmTTL5<br>ceTTL5-15 | AKLVYTNCSFCSPPAAVLLQRLPSSHLSSVITTSALSAGPGHHSLSQIPPAVPSLPHQP<br>-----   | 948  |
| mmTTL5<br>ceTTL5-15 | ALLLSPVPDNAPPSIHSGTQNVSPAGLPRCRSGSYTIGPFSSFQSAHIYSQKLSRPSSA<br>-----   | 1008 |
| mmTTL5<br>ceTTL5-15 | KAAGSCHPHKHHSGIAKTQKEGEDVSLNRRYNQSLVTAELQRLAEKQAARQYSPASHISL<br>-----  | 1068 |
| mmTTL5<br>ceTTL5-15 | LTOQVTNLNLASSVINRSSASTPPTLRPVISPSGPTWSIQPDLHASETHSSPPGSRSLQT<br>-----  | 1128 |
| mmTTL5<br>ceTTL5-15 | GGFAWEGEVENNAYSKTTGVVPQHKYHPTAGSYQLHFALQOLEQOKLQSRQLLDQSRARH<br>-----  | 1188 |
| mmTTL5<br>ceTTL5-15 | QAIFGSQTLPNSSLWTMNNPGPCRISSTATTGGQKPNLTPQKVVAPPNSSTLVSKPASNHK<br>----- | 1248 |
| mmTTL5<br>ceTTL5-15 | QVLRKPASQRASKGSSAEGQLNGLQSSLNPAAFMPITNSTGSLEAPQVIFARSKPLPTQS<br>-----  | 1308 |
| mmTTL5<br>ceTTL5-15 | GALATVIGQRKSKSVKSGTI<br>-----                                          | 1328 |

Key:

DOMAIN NOT INCLUDED

Predicted Substrate Interacting Domains

ATP & Mg<sup>2+</sup> Interacting Domains

Essential ATP-Binding Residues

Extended TTL-Domain

Core TTL-Domain

Cationic MT Binding Domain

Deletion
